# Supplementary material for: Systematic investigation on charge storage behaviour of multidimensional poly(3,4-ethylenedioxythiophene) nanostructures
Source: Royal Society of Chemistry journal article supplement (doi:10.1039/c4ra06161f), 2014-08-06
Supplement: c4ra06161f1.pdf [file c4ra06161f1.pdf]

## Supporting Information

### **Systematic Investigation on Charge Storage Behaviour of Multidimensional Poly(3,4-ethylenedioxythiophene) Nanostructures**

Ji Eun Lee<sup>2,†</sup>, Seon Joo Park<sup>3,†</sup>, Oh Seok Kwon<sup>4</sup>, Hyeon Woo Shim<sup>2</sup>, Jyongsik Jang,<sup>3</sup> and Hyeonseok Yoon<sup>1,2,\*</sup>

<sup>1</sup>Alan G. MacDiarmid Energy Research Institute, School of Polymer Science and Engineering, Chonnam National University, Gwangju 500-757, South Korea.

<sup>2</sup>Department of Polymer Engineering, Graduate School, Chonnam National University, Gwangju 500-757, South Korea.

<sup>3</sup>School of Chemical and Biological Engineering, Seoul National University, Seoul 151-742, South Korea.

<sup>4</sup>Department of Chemical and Environmental Engineering, School of Engineering and Applied Science, Yale University, New Haven, Connecticut 06511, United States.

<sup>†</sup> These authors contributed equally.

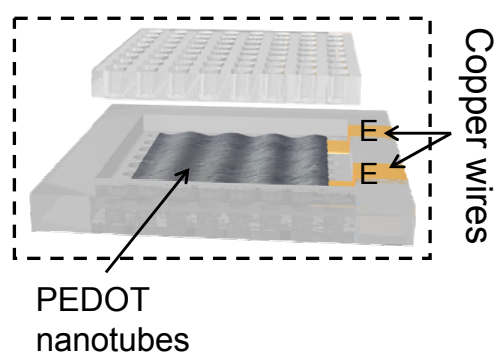

**Figure S1.** Scheme of a home-made electrode substrate for measuring  $I$ - $V$  characteristics.

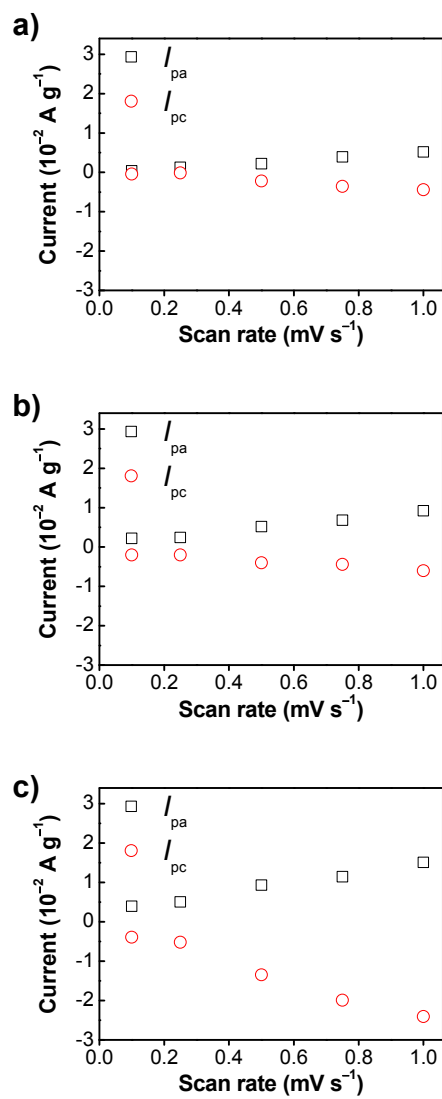

**Figure S2.** Plots of the peak current (the anodic peak current,  $I_{pa}$ ; the cathodic peak current  $I_{pc}$ ) vs. the scan rate: (a) control, (b) NRs, and (c) NNs.

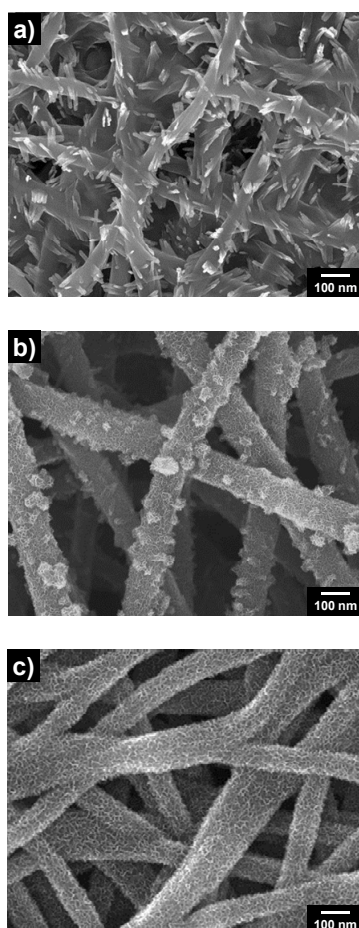

**Figure S3.** SEM images of *m*PNTs treated with different amounts of 0.01 M  $\text{KMnO}_4$  solution for 30 min: (a) 0 mL, (b) 1 mL, and (c) 5 mL.

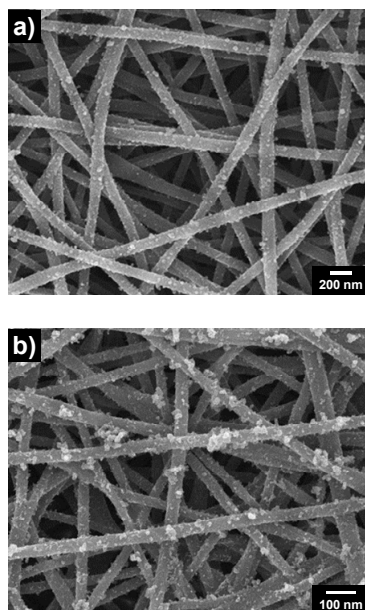

**Figure S4.** SEM images of *mPNTs* treated with 1 mL of 0.01 M  $\text{KMnO}_4$  solution during different time periods: (a) 30 min and (b) 60 min.

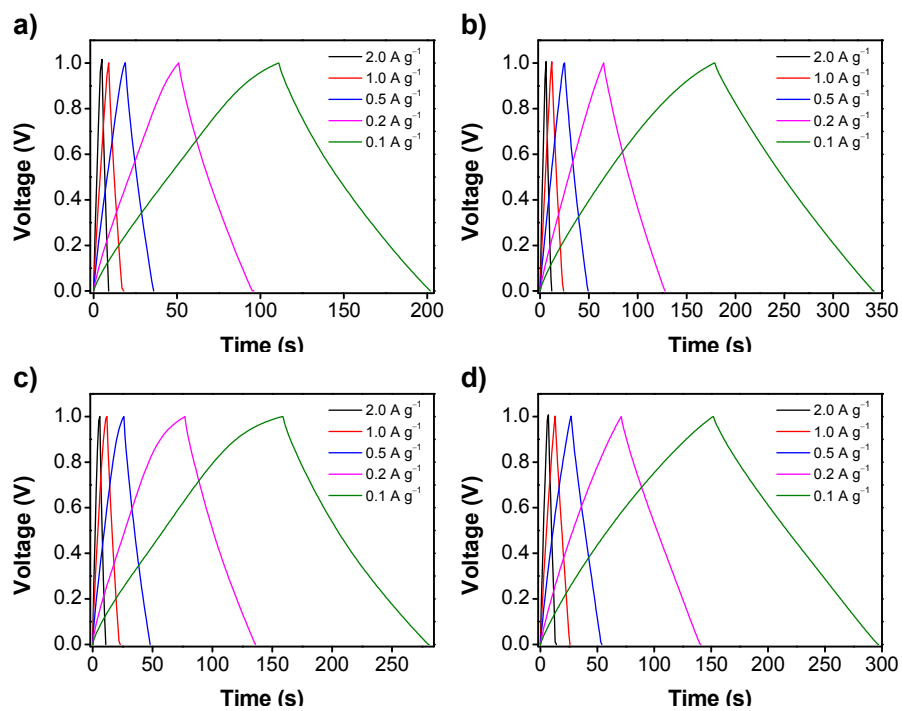

**Figure S5.** Galvanostatic charge/discharge curves of (a) symmetric MnO<sub>2</sub>-*m*PNTs cell, (b) symmetric RGO-CNFs cell, (c) asymmetric RGO-CNFs//MnO<sub>2</sub>-*m*PNTs cell, and (d) asymmetric MnO<sub>2</sub>-*m*PNTs//RGO-CNFs cell at different current densities.

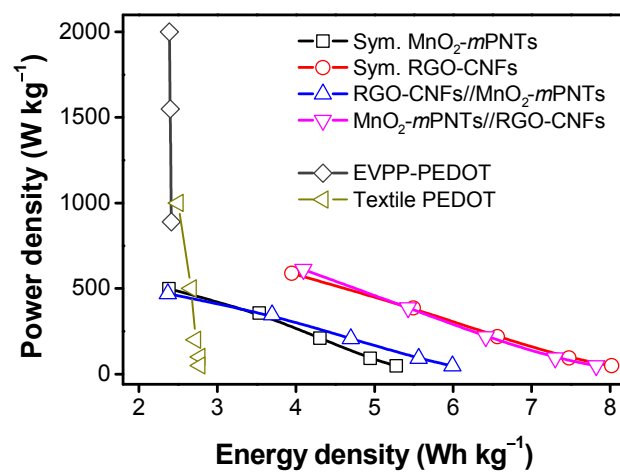

**Figure S6.** Ragone plots of symmetric and asymmetric capacitor cells. Information on two capacitor cells from the literatures ([14] EVPP-PEDOT; [15] textile PEDOT) were added for comparison.

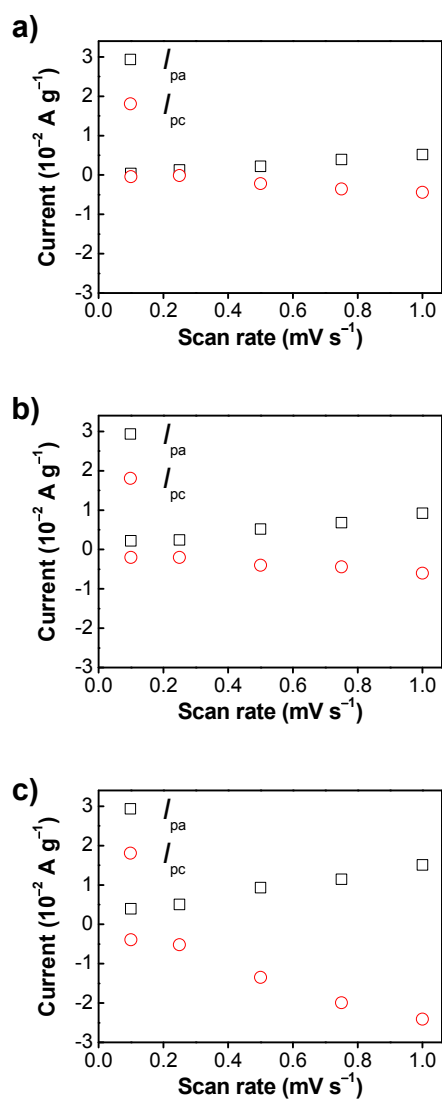

**Figure S1.** Plots of the peak current (the anodic peak current,  $I_{pa}$ ; the cathodic peak current  $I_{pc}$ ) vs. the scan rate.



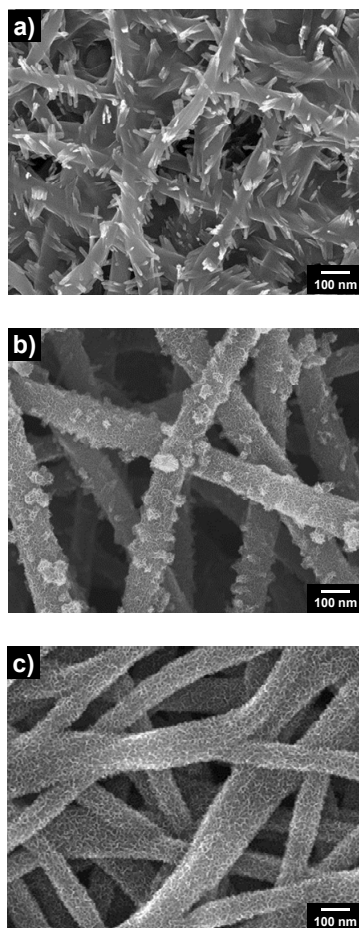

**Figure S2.** SEM images of *m*PNTs treated with different amounts of 0.01 M  $\text{KMnO}_4$  solution for 30 min: (a) 0 mL, (b) 1 mL, and (c) 5 mL.

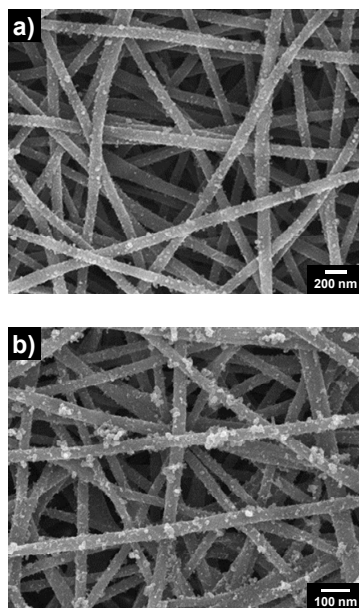

**Figure S3.** SEM images of *mPNTs* treated with 1 mL of 0.01 M  $\text{KMnO}_4$  solution during different time periods: (a) 30 min and (b) 60 min.

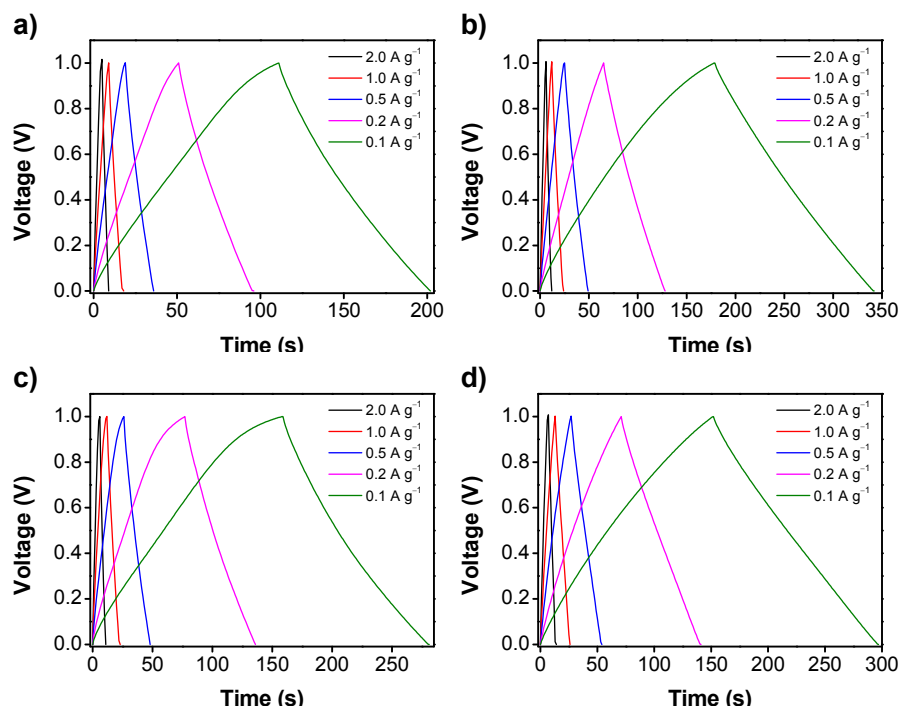

**Figure S4.** Galvanostatic charge/discharge curves of (a) symmetric MnO-*m*PNTs cell, (b) symmetric RGO-CNFs cell, (c) asymmetric RGO-CNFs//MnO-*m*PNTs cell, and (d) asymmetric MnO-*m*PNTs//RGO-CNFs cell at different current densities.
